# Supplementary material for: Continental drivers of ammonium and nitrate in Australian soil under different land uses
Source: Copernicus journal article supplement (doi:10.5194/soil-2018-5), 2018-04-24
Supplement: Supplementary file [file soil-2018-5-AC8-supplement.pdf]

# Continental soil drivers of ammonium and nitrate in Australia

Juhwan<sup>1</sup>, Gina M.<sup>2</sup>, and Raphael A.<sup>1</sup>

<sup>1</sup>CSIRO Land and Water, GPO Box 1700, Canberra ACT 2601, Australia

<sup>2</sup>Agroscope, Zurich 8046, Switzerland

**Correspondence:** Juhwan Lee (juhwan.lee@csiro.au)

**Abstract.** Soil N is an essential element for plant growth, but its mineral forms are subject to loss to the environment by leaching and gaseous emissions. Despite its importance for the soil-plant system, factors controlling soil mineral N contents over large spatial scales are not well understood. We used  $\text{NH}_4^+$  and  $\text{NO}_3^-$  contents (0–30 cm depth) from 469 sites across Australia, and determined soil controls on their regional variation. Soil mineral N varied regionally but depended on the different land uses. In the agricultural region of Australia,  $\text{NH}_4^+$  tended to be similar (median 4.0 vs. 3.5 mg N kg<sup>-1</sup>) and  $\text{NO}_3^-$  was significantly enriched (3.0 vs. 1.0 mg N kg<sup>-1</sup>), compared to the non-agricultural region. The importance of soil controls on mineral N in the agricultural region, identified by the model trees algorithm Cubist, showed that  $\text{NH}_4^+$  was affected by total N, cation exchange capacity (CEC) and pH. In the non-agricultural region,  $\text{NH}_4^+$  was affected by CEC and pH, but also organic C and total P. In each of the regions,  $\text{NO}_3^-$  was primarily affected by CEC, with more complex biophysical controls. In both regions, correlations between mineral N and soil C:N:P stoichiometry suggest that more  $\text{NH}_4^+$  was found in P-depleted soil relative to total C and total N. However, our results showed that only in the non-agricultural region,  $\text{NO}_3^-$  was sensitive to the state of C and its interaction with N and P. The models helped to explain 36–68% of regional variation in mineral N. Although soil controls on high N contents was highly uncertain, we found that region-specific interactions of soil properties control mineral N contents and therefore it is essential to understand how they alter soil mechanisms and N cycling at large scales.

## 1 Introduction

Nitrogen is an essential element and one of the main factors limiting the functioning and productivity of various soil-plant systems. This is particularly the case in cropping-dominant systems, where annual crop productivity often depends on rotations with N<sub>2</sub>-fixing legumes or continuous addition of chemical fertilizer or organic matter. External N enters the soil (e.g., atmospheric N deposition and fertilizer N) and plants (e.g., N<sub>2</sub> fixation), and cycles through them in various chemical forms or states, mostly mediated by soil microbes. Mineralization (ammonification), microbial immobilization, nitrification and denitrification determine the availability of  $\text{NH}_4^+$  or  $\text{NO}_3^-$  that can be taken up by plants or lost to the environment, which in turn contributes to the regulation of terrestrial C sequestration (Post et al., 1985; Rastetter et al., 1997; Luo et al., 2004; Thornton et al., 2007; Ciais et al., 2013). Biotic and abiotic transformations of N from mineralized soil organic matter or derived from external soil inputs are spatially and temporally variable. In addition, different mineral forms of N (e.g.,  $\text{NH}_4^+$  and  $\text{NO}_3^-$ ) often show different distribution patterns and relative importance in terms of contribution to total N stocks across a broad range of

land uses and management practices due to different climatic and ecological conditions (Johnston, 1993; Farley and Fitter, 1999).

Managed soil, especially that used for agricultural production and grazing, is often characterised by N imbalances and reactive N losses to the environment (Vitousek et al., 1997; Ciais et al., 2013; Fowler et al., 2013). One of the consequences of continuous cropping on the N cycle is the increased emissions of ammonia, N oxides ( $\text{NO}_x$ ), and nitrous oxide ( $\text{N}_2\text{O}$ ), mainly through N fertilizer application. Nitrous oxide is a potent greenhouse gas and ozone-depleting substance, while  $\text{NO}_x$  produces ozone in the troposphere (Ravishankara et al., 2009). Other concerns include leaching of  $\text{NO}_3^-$  to groundwater, which may contribute to terrestrial and coastal eutrophication (Conley et al., 2009). Accordingly, there are increasing demands to measure or simulate the fate of residual mineral N across agricultural areas as well as in the soil under native vegetation, which can be conceptually linked to the loss of N to air and water upon land-use conversion. Indeed, there is a strong need for large-scale soil information from which to accurately define current baselines and to determine the state of soil mineral N and its response to soil conditions. However, such large-scale soil information is generally not available.

Soil mineral N contents can be highly variable and uncertain because multiple reaction pathways and oxidation states of N processes exist (Butterbach-Bahl et al., 2013). Nitrogen transformation processes in soil are controlled by the complex interactions of soil variables, such as substrate availability, pH, temperature and water content, which are affected by ecological factors (i.e., soil, climate, vegetation and topography) and past management history. In particular, soil properties related to the storage and quality of soil organic matter and its management could affect the levels and variation in soil  $\text{NH}_4^+$  and  $\text{NO}_3^-$  (Vagstad et al., 1997). Soil N transformations also involve the biogeochemistry of other nutrients, such as C and P, which are key constituents of organic molecules. In particular, regular N input into the soil, including plant N returning to soil as residues or decomposing roots, is important for the maintenance of soil organic C (SOC), and therefore the availability of soil N to plants, and closely interacts with the terrestrial organic C sink (Rastetter et al., 1997; Zaehle, 2013). Stiles et al. (2017) showed that N fertilizer addition alone resulted in an increase in both SOC and total N, but the combined addition of N and P had the opposite effect. Conversely, there are studies showing that SOC can be depleted by N fertilizer application (Neff et al., 2002; Shahbaz et al., 2017). Overall, N cycling is closely linked to soil C sequestration and stabilization, but C-N cycle coupling can be complicated through changes in soil P. Glendining et al. (2011) found that, globally, SOC and the C:N ratio of soil organic matter are important controls of total N in soil, although large uncertainties remain. Therefore, the effects of soil N and P and their elemental interactions on mineral N dynamics are important (Booth et al., 2005; Taylor and Townsend, 2010), but they have not been widely explored across large spatial scales.

Differences in inherent soil properties, as well as land use, cause a shift in dominant forms of soil N and its distribution across sites. Land uses are generally characterized by vegetation types, dominant sources of soil N input and the levels of soil disturbance and often coincide with climate and ecological conditions. Therefore, it may be possible to specifically compare the patterns of mineral N across broad regions by land use. The amount of N stored in soil in organic and mineral forms is considered a limiting factor for the primary productivity of many ecosystems. How primary productivity is managed affects the rate at which soil N and other essential nutrients are replenished. Yet, there is often a long-term tendency of ecological properties, such as biodiversity, to decline with external additions of reactive N through atmospheric deposition and fertilizer

inputs (De Schrijver et al., 2011). It is therefore important to determine soil mineral N patterns and their controlling factors, but there are limited soil N data available for understanding plant and soil processes at different scales.

Since primary soil controls on mineral N are largely unknown at the continental-scale of Australia, it is relevant to measure and understand how the state of soil N differs between regions, where diverse dominant land-use conditions exist. Our aim here is to determine soil controls on the continental variation in soil  $\text{NH}_4^+$  and  $\text{NO}_3^-$  contents between and within the agricultural and non-agricultural regions of Australia. We focused on a set of soil attributes and assessed their importance for determining the large-scale drivers of mineral N contents by land use.

## 2 Materials and Methods

### 2.1 Data sets

We used two soil data sets for our analysis. First, the Biomes of Australian Soil Environments (BASE) project (Bissett et al., 2016) provides soil and other contextual data across the continent, originally developed for assessment of soil biodiversity (available at <https://data.bioplatforms.com>). The BASE project performed soil sampling and analysis, as described in Bissett et al. (2016). For this study, we obtained the contents of soil  $\text{NH}_4^+$  and  $\text{NO}_3^-$  ( $\text{mg N kg}^{-1}$ ), total organic C (TOC) (%), exchangeable cations ( $\text{Al}^{3+}$ ,  $\text{Ca}^{2+}$ ,  $\text{Mg}^{2+}$ ,  $\text{K}^+$ , and  $\text{Na}^+$  in  $\text{meq } 100 \text{ g}^{-1}$ ), texture (%) and pH (in  $\text{CaCl}_2$ ) from BASE, which were measured at the 0–0.1 m and 0.2–0.3 m depths from over 650 sites across Australia between 2011 and 2016 (Fig. 1). Each sample was collected from a site that represented a unique combination of soil, climate and management. Specifically, between 9 and 30 soil cores were sampled in a  $25 \text{ m} \times 25 \text{ m}$  quadrat and split into two different depths, 0–0.1 m and 0.2–0.3 m, respectively, and then combined into one composite sample (approximately 1 kg of soil) for each depth. Site soil sampling was done in a destructive manner, and measured at a single time point. The contents of mineral N were determined colorimetrically on dried soil samples < 2 mm after extraction with 1 M KCl. Spatial distribution of  $\text{NH}_4^+$  and  $\text{NO}_3^-$  content can be different and temporally unstable for each site (Giebel et al., 2006). So far, this is the most comprehensive data describing soil mineral N pools across different soil and land-use types of Australia at the continental scale, including a wide range of agricultural soil conditions. At the scale of study, we assumed that spatial patterns of soil mineral N remained persistent with time. This assumption was based on the number of sites across which the effect of confounding factors may be minimized. The size of sampling area was fixed to match the smallest grid size of legacy soil attribute maps in Australia. Although fine-resolution (< 25 m) soil heterogeneity was not addressed, the BASE data of soil  $\text{NH}_4^+$  and  $\text{NO}_3^-$  contents could be extended with key soil attributes previously produced from national mapping efforts but not measured in BASE. The exchangeable cations were summed to estimate cation exchange capacity (CEC).

Second, to complement the BASE data set, we used Australian soil attribute values extracted from recently produced soil maps with robust uncertainty estimates at a pixel resolution of  $90 \times 90 \text{ m}$  (or 3-arcsecond) (Viscarra Rossel et al., 2015). The maps that we used were the percentage of total N (TN) and total P (TP) contents, bulk density (BD) ( $\text{g cm}^{-3}$ ), and available water capacity (AWC). Each of the Australian soil attribute maps were independently produced by 3D spatial modeling that combined historical soil data and estimates derived from visual and infrared soil spectra. The approaches used to produce the

maps were described in detail in Viscarra Rossel et al. (2015). When the soil maps were produced at the fine spatial scale, auxiliary environmental data were already considered in the spatial modeling. These variables represent proxies for the main environmental factors of soil formation, which were related to parent material, climate, biota and vegetation, and terrain and landscape position. For this study, a weighted average over the 0–5, 5–15, and 15–30 cm depths was calculated for each of the mentioned soil variables. The depth-average values of each soil attribute were extracted using the coordinates from the 469 sites at which both  $\text{NH}_4^+$  and  $\text{NO}_3^-$  contents were measured. Extracting grid values to each geographic location and compiling data was done in the Geographic Resources Analysis Support System (GRASS) GIS 7.2 (<http://grass.osgeo.org>).

## 2.2 Data analyses

The data set was screened for any missing values of land uses and soil properties. A total of 469 sites were retained for data analyses (Fig. 1), and we performed the analyses on (1) all samples, (2) the samples from the sites that mainly originate from dryland and irrigated cropping, and from improved and native pastures used for animal grazing (hereafter referred to as the “agricultural” region), and (3) the samples from the protected sites and those in natural environments outside of the agricultural production zones (referred as the “non-agricultural” region) (Fig 1). The agricultural region (160 sites) covers the main grain-cropping zones of Australia, which differs by climate and soil regimes, and farming practices. Sites used for agricultural production from relatively natural environment did not receive external N fertilization but some N excretion by grazing animals or biomass inputs from commercial production. If the content of soil mineral N in the data was reported as the value at or below the detection limit of 1 ppm, it was replaced with  $0.5 \text{ mg N kg}^{-1}$  (a median of the detection limit). The content of soil mineral N was averaged over the two sampling depths and then log-transformed to approximate normality. Mean comparisons of the log-transformed data were performed between the regions at the 0.05 significance level ( $p < 0.05$ ) using analysis of variance (ANOVA). Tukey’s HSD test was used to compare the measured mineral N contents among the multiple land uses. The data set covered four general land uses: 1) conservation and natural environments, 2) production from dryland agriculture and plantations, 3) production from irrigated agriculture and plantations and 4) production from relatively natural environments. The general land use classes included 28 detailed land uses, according to the Australian Land Use and Management Classification (Supplementary Table 1).

The contents of soil  $\text{NH}_4^+$ ,  $\text{NO}_3^-$ , TOC, TN, TP, CEC, and the fraction of sand, silt, and clay, BD, and AWC, except for pH, were log-transformed for further modeling. For each of soil  $\text{NH}_4^+$  and  $\text{NO}_3^-$  measurements, data analyses were performed on the whole data, including 22 samples for  $\text{NH}_4^+$  and 170 samples for  $\text{NO}_3^-$  that were measured under the detection limit. Only 3 and 42 of these samples for  $\text{NH}_4^+$  and  $\text{NO}_3^-$  were located within the agricultural region, respectively. Empirical models of soil mineral N as a function of the selected soil properties were built using the machine learning algorithm Cubist (Quinlan, 1992). Cubist is a form of rule-based decision tree with piecewise linear models. Models were developed and evaluated by 10-fold 50-repeated cross-validation. Model performance was assessed using the coefficient of determination ( $R^2$ ), the root mean squared error (RMSE), the mean error (ME), and the standard deviation of the error (SDE). In Cubist, the number of committees was fixed as one to avoid producing complex models, but the number of nearest neighbors was optimized using the RMSE of resampling results. The optimized models consisted of 1–8 different rule sets, with 3–9 neighbors. The importance

of each soil variable was assessed based on the usage of each individual variable in the rule conditions and the model for Cubist. The cut-off was set at 80% as the probability to be essentially used in either the rule conditions or the linear model. In addition, the sensitivity of important soil variables was tested with 5, 10, and 20 committee models. The same data analysis and regression approach were applied on the data sets for the agricultural and non-agricultural regions separately, and then a Pearson correlation analysis was performed, accordingly. All statistical analyses and Cubist modeling were performed in R version 3.4.3 (R Core Team 2017). Functions from the “Cubist” (version 0.0.21) and “caret” (version 6.0.76) packages were used.

### 3 Results

#### 3.1 Soil mineral N in relation to large-scale land use

- 10 The median contents of  $\text{NH}_4^+$  and  $\text{NO}_3^-$  in the soil were 3.5 and 1.5 mg N  $\text{kg}^{-1}$ , respectively, across all sites (Fig. 5). The interquartile range of  $\text{NH}_4^+$  and  $\text{NO}_3^-$  contents were 1.75–6.0 and 0.5–4.5 mg N  $\text{kg}^{-1}$ . The corresponding coefficient of variation was 147% for  $\text{NH}_4^+$  and 215% for  $\text{NO}_3^-$  across the sites, showing wide variation in the measured soil mineral N. The median sum of  $\text{NH}_4^+$  and  $\text{NO}_3^-$  was 6.0 mg N  $\text{kg}^{-1}$ , with the interquartile range of 3.5–12.0 and the maximum up to 123 mg N  $\text{kg}^{-1}$ . Compared to the non-agricultural region, the soil in the agricultural region had similar contents of  $\text{NH}_4^+$  (4.0 vs. 3.5 mg N  $\text{kg}^{-1}$ ), but significantly ( $p < 0.05$ ) larger contents of  $\text{NO}_3^-$  (3.0 vs. 1.0 mg N  $\text{kg}^{-1}$ ). There were a number of sites with relatively small contents of mineral N, particularly  $\text{NO}_3^-$ . If we only considered soil  $\text{NO}_3^-$  contents above the detection limit, the median  $\text{NO}_3^-$  contents then increased to 4.5 mg N  $\text{kg}^{-1}$  in the agricultural region and to 2.5 mg N  $\text{kg}^{-1}$  in the non-agricultural region, respectively. Nevertheless, the regional patterns of  $\text{NH}_4^+$  and  $\text{NO}_3^-$  remained consistent. The sum of soil mineral N showed a regional difference similar to that of  $\text{NO}_3^-$ . For all sites, the ratio of  $\text{NH}_4^+$ -N to  $\text{NO}_3^-$ -N was about 2.0 (interquartile range 0.75–6.0). Specifically, soil  $\text{NH}_4^+$  was identified as a dominant mineral form of N at 309 sites. The  $\text{NH}_4^+$  and  $\text{NO}_3^-$  fractions of TN were 0.4% and 0.2%, respectively, and comprised together approximately 1–2% of TN in the soil at the sites. The  $\text{NO}_3^-$  fraction of TN ranged between 0.01% and 10.0% and appeared to be more variable than that of  $\text{NH}_4^+$ , which had the range of 0.05–5.8%. The  $\text{NH}_4^+$ -N :  $\text{NO}_3^-$ -N ratio was significantly lower in the agricultural region (median 1.4) than the non-agricultural region (median 2.3). This also corresponded to a significantly higher  $\text{NO}_3^-$  fraction of TN in the agricultural region than in the non-agricultural region.

- 25 The contents of  $\text{NH}_4^+$  and  $\text{NO}_3^-$  differed by both broad and detailed land uses (Table 1). Soil  $\text{NH}_4^+$  contents showed no difference among the broad land uses, but there was more variation for conservation and natural environments compared to the other land uses. Relatively low  $\text{NH}_4^+$  contents were found in the soil used for production from relatively natural environments. Overall, also considering the limited data, no apparent differences were found between the detailed land uses. Large soil  $\text{NO}_3^-$  contents generally resulted from agricultural production, compared to the soil in conservation and natural environments or used mainly for production from relatively natural environments. This pattern was generally found for detailed land uses as well.

### 3.2 Soil controls on the contents of mineral N

The importance of each of the soil variables as the primary controlling factor over soil mineral N are shown in Fig. 3. Across all sites, TOC, TN, TP, the clay fraction, CEC and pH appeared to have effects on  $\text{NH}_4^+$  contents. Especially, the variation in soil  $\text{NH}_4^+$  contents was consistently related to pH (Supplementary Fig. 1). The contents of  $\text{NO}_3^-$  were affected by primarily affected by CEC, and to a lesser extent by similar soil controls as for  $\text{NH}_4^+$ . In addition, BD was identified as a potential driver for  $\text{NO}_3^-$  only. In the agricultural region, soil  $\text{NH}_4^+$  was controlled by TN, CEC, and pH, while TN and CEC as well as TOC, sand fraction, and AWC were important controlling factors of  $\text{NO}_3^-$ . Among these soil properties, only pH and CEC showed consistent large-scale effects on mineral N (Supplementary Fig. 1 and 2). There was no effect of TOC and TP on  $\text{NH}_4^+$ , but their effects were important in more complex models. In the non-agricultural region, soil  $\text{NH}_4^+$  was affected by TOC, TP, CEC, and pH. Soil  $\text{NO}_3^-$  was affected by all selected soil variables in the same region, where BD, CEC and TOC were the most important factors. There was some effect of TN, but TP and pH had relatively less important contribution in contrast to its importance for the soil controls on  $\text{NH}_4^+$ . In general, based on Pearson's correlation coefficients, the contents of  $\text{NH}_4^+$  and  $\text{NO}_3^-$  were significantly correlated with the soil variables identified by Cubist (Table 2). The exception was CEC, which was not correlated with but selected as important for  $\text{NH}_4^+$  in the agricultural region. A similar case was found between  $\text{NO}_3^-$  and TN or BD when accounting for all sites or regions.

After cross-validation, Cubist models were able to explain  $60 \pm 11\%$  of the measured variation for  $\text{NH}_4^+$  and  $42 \pm 13\%$  for  $\text{NO}_3^-$  in the soil across all sites (Table 3). The models were evaluated by considering all sites together, as well as the sites in each of the regions separately. Specifically, the RMSE and SDE of the region-specific models tended to decrease, showing overall improvement in accuracy and precision. The Cubist models appeared to reasonably cover a range of measured  $\text{NH}_4^+$  and  $\text{NO}_3^-$  contents for each selected region (Fig. 4). However, the model failed to reproduce a high range of measured mineral N values when considering all sites or each of the regions. Therefore, the soil factors identified by the model may have unstable effects on these high values.

### 3.3 Relationships between mineral N and soil C, N, and P stoichiometry

Depending on the specific region, soil nutrients had distinct effects on the level of each mineral form of N. In the agricultural region (Fig. 5), soil  $\text{NH}_4^+$  was directly related to TN and TOC to a lesser extent TP, with significant effects from the interaction of total soil nutrients ( $p < 0.05$ ). Soil  $\text{NO}_3^-$  was significantly related to TP only in the agricultural soil ( $p < 0.05$ ). However, no significant relationships between  $\text{NO}_3^-$  and all soil elemental ratios, and the model, suggest that the contents of  $\text{NO}_3^-$  were insensitive to changes in elemental TP but indirectly related to TOC or TN. In the non-agricultural region (Fig. 6), each of the total nutrient contents was significantly related to the distribution of soil  $\text{NH}_4^+$  in a similar manner to the soil in the agricultural region. This suggests that TOC was a main controlling factor, but the effects of elemental interactions would be potentially important, also corresponding to those from the modeling. Specifically, the levels of  $\text{NH}_4^+$  increased in the P-depleted soil relative to the other nutrients in both regions.

## 4 Discussion

### 4.1 Continental variation in soil $\text{NH}_4^+$ and $\text{NO}_3^-$

The distribution of  $\text{NH}_4^+$  and  $\text{NO}_3^-$  in the soil, and the ratio of  $\text{NH}_4^+$ -N to  $\text{NO}_3^-$ -N show that  $\text{NH}_4^+$  is a predominant source of N for plant uptake or other biological processes across the sites, compared to  $\text{NO}_3^-$ . This suggests that the risk of loss from leaching and denitrification may not be large or evident at the scale of the study or from the sparse data set. The sum of  $\text{NH}_4^+$  and  $\text{NO}_3^-$  at the sites might be useful to approximately set the potential limits of inherent soil N availability, and thus the relevant limits for mineral N management particularly in the agricultural region of Australia. However, it was again based on limited soil data across a vast area of the continent and should be interpreted with caution. The distribution of  $\text{NO}_3^-$  was characterized by relatively low values or values under the detection limit, which suggest that those soils were depleted in  $\text{NO}_3^-$ . On the other hand, large-scale variation in soil  $\text{NO}_3^-$  and total mineral N contents should be considered when making implications for regional effects of land use patterns on soil N dynamics. The  $\text{NO}_3^-$  fraction, relative to  $\text{NH}_4^+$ , of TN substantially increased if the soil with small  $\text{NO}_3^-$  contents was excluded (data not shown). There may be also extreme values for  $\text{NH}_4^+$  and  $\text{NO}_3^-$ , usually higher than 45–50 mg N kg<sup>-1</sup> approximately equivalent to 150–200 kg N ha<sup>-1</sup>, representing potential hot spots. Such a wide range of  $\text{NH}_4^+$  and  $\text{NO}_3^-$  contents, on top of spatially scarce soil data, presents a challenge to determine the responses of varying mineral N to soil factors in different regions defined by broad land uses.

We found complex, but consistent regional patterns of soil  $\text{NH}_4^+$  and  $\text{NO}_3^-$  by broad land uses. The soil in the agricultural region was characterized by relatively smaller  $\text{NH}_4^+$  but significantly larger  $\text{NO}_3^-$  contents than the soil in the non-agricultural region, generally from conservation areas and natural environments (Fig. 5). However, each site in the agricultural region represents more modified landscapes for production. This region accounts for most of the soil conditions affected by land uses particularly related to agricultural production and grazing. Overall, more  $\text{NO}_3^-$  appeared to be accumulated in the soil under agricultural conditions because of the significant mean difference in the sum of mineral N between the regions. The relative accumulation of soil  $\text{NO}_3^-$  was also supported by the ratio of  $\text{NH}_4^+$  to  $\text{NO}_3^-$ , which was considerably lower in the soil from the agricultural region compared to that in the non-agricultural region. The soil receiving high N inputs from external sources and recycled N may have more  $\text{NO}_3^-$  in the balance of soil  $\text{NH}_4^+$  and  $\text{NO}_3^-$  pools (Watson and Mills, 1998). In the agricultural region, historical soil N input is known to enhance potential N nitrification over time, although it is further complicated by continuous soil disturbance (e.g., intensive tillage) and various tillage intensities (Angus and Grace, 2017). In addition, the soil's capacity to supply  $\text{NH}_4^+$  through N mineralization may have been decreased with soil organic matter decline in response to continuous soil disturbance (Viscarra Rossel et al., 2014). Regional balance of soil mineral N would in part depend on preferential N uptake in main crops (Haynes and Goh, 1978; Gastal and Lemaire, 2002; Andrews et al., 2013). However, this effect has not been shown for many crops grown in the region, and thus more data are needed to further confirm this.

Land-use types play a role as the major sources of regional differences in soil  $\text{NH}_4^+$  and  $\text{NO}_3^-$  across the sites (Table 1). It is therefore promising to split the continental data on mineral N into the region-specific variation in N based on land uses, if the current land uses were maintained with minimal spatial and temporal changes. Land uses and associated conditions can geographically constrain or be constrained by each other, contributing to regional differences in soil characteristics and N



transformation rates (Booth et al., 2005). As shown above, the amount of  $\text{NO}_3^-$  or the sum of  $\text{NH}_4^+$  and  $\text{NO}_3^-$  stored in the soil was distinctly characterized between the regions, subject to different dominant land uses. The land-use types affected by production activities have been driven by N inputs and eventually led to enrichment of soil  $\text{NO}_3^-$ , also as suggested by the differences in mineral N between the agricultural and other non-agricultural regions.  $\text{NH}_4^+$  was depleted in the soil within low-  
5 input or relatively natural environments used for production compared to the soil under conservation and natural environments not used for agricultural purposes. This has important implications because resource-based production systems with little or no input (e.g., grazing of native vegetation) may not be sustainable compared to input-driven production systems. The effect of agricultural land uses on the levels of  $\text{NH}_4^+$  and  $\text{NO}_3^-$  may depend on the interactive effect of soil management and external N input from anthropogenic sources (Fueki et al., 2010). Similarly, soil  $\text{NH}_4^+$  and  $\text{NO}_3^-$  contents under cropping were about  
10 2.5 and 4.5 mg N  $\text{kg}^{-1}$ , respectively, showing the decline in  $\text{NH}_4^+$  but enrichment of  $\text{NO}_3^-$ . The levels of soil mineral N were highly variable in the protected or natural environments, particularly for  $\text{NH}_4^+$ , similar to the patterns between the regions. Presumably, this was due to the differences in the amount and quality of biomass input under natural vegetation and crop production, leading to different soil organic matter decomposition (source) versus N immobilization (sink) (Post et al., 1985; Post and Kwon, 2000).  
15 Among ecological factors, the climatic variables, such as precipitation and temperatures, are known to strongly limit soil N storage across spatial scales (Post et al., 1985; Liu et al., 2017). In this study, however, we did not determine how soil mineral N status would change under other climatic and ecological conditions in Australia. This was because most of the sites were located in arid or temperate ecological zones. Given the number of the sites, the extent and support of measured soil data did not fully represent a possible range of soil conditions. Therefore, further measurements are needed to account for diverse  
20 agro-ecological settings.

#### 4.2 Soil controls over the measured variation in $\text{NH}_4^+$ and $\text{NO}_3^-$

Interactions between soil variables and related processes operating on multiple aspects of the N cycle are often difficult to understand at the continental scale. Much less is known about the large-scale effect of land-use patterns on soil mineral N dynamics. In this study, we used the measured data as well as the high-resolution soil values from model predictions that  
25 are reliable and accurate with small to moderate uncertainty (Viscarra Rossel et al., 2015; Viscarra Rossel and Bui, 2016). Although potential uncertainties exist in the data as a proxy for “real” soil conditions, multiple soil variables were significantly related to  $\text{NH}_4^+$  and  $\text{NO}_3^-$  contents in the soil at all sites and between the regions (Table 2). In Cubist models, a comparable set of the soil variables acted as the controlling drivers on the distribution of  $\text{NH}_4^+$  and  $\text{NO}_3^-$  across the sites (Table 2 and Fig. 3). Rule-based models are practical to interpret and extrapolate plant N availability and N losses under various conditions. These  
30 common soil drivers suggest that similar mechanisms drive  $\text{NH}_4^+$  and  $\text{NO}_3^-$  to some extent, linking them together. It is well known that CEC contributed to the potential to retain both  $\text{NH}_4^+$  and  $\text{NO}_3^-$ . In addition, there were probably more complex interactions of soil controls on  $\text{NO}_3^-$  contents, for example, including additional effects of soil texture. Since the selected soil variables can potentially determine soil mineral N availability and losses, the accurate measurement and mapping of soil attributes are important for continental simulations of soil N dynamics. Some of the soil variables, particularly CEC, may have



indirect effects on soil mineral N, presumably confounded by other predominant drivers, such as soil texture and BD (Saxton et al., 1986; Dunne and Willmott, 1996).

It is important to note that the importance of soil controlling factors was different between the agricultural and non-agricultural regions. These variables previously identified as important across the sites could serve as conditional controls between the regions, depending on dominant land-use and vegetation types. Particularly for the soil in the agricultural region, the contents of soil  $\text{NH}_4^+$  and  $\text{NO}_3^-$  tended to be controlled by only 3–5 primary drivers, with the interactions of less important variables. These included pH for  $\text{NH}_4^+$  and CEC for  $\text{NO}_3^-$  in the soil. Total organic C, TN, and TP had varying degrees of importance that were specific for each mineral form of N between regions. In the agricultural region,  $\text{NH}_4^+$  positively depended on TN and thus the distribution and sources of organic matter and potential N availability in the soil. Instead,  $\text{NH}_4^+$  retention capacity may become important through pH and CEC effects. In the non-agricultural region, soil  $\text{NH}_4^+$  might depend on mineralization of organic matter sources, but less limited by TN or TP under near steady-state conditions. Soil  $\text{NO}_3^-$  was positively affected by TOC and TN in the agricultural region, where it could be more affected by the capacity of the soil to immobilize residual  $\text{NO}_3^-$  if ample N supply was assumed. In contrast,  $\text{NO}_3^-$  was affected to a certain extent by TOC and TN and the effect of TP remained relatively higher in the non-agricultural region, receiving limited soil inputs. Thus, soil  $\text{NO}_3^-$  may presumably be associated with organic matter and N mineralization rates. At this stage, however, no clear mechanisms would be evident by the different drivers of mineral N contents between the regions. Nevertheless, land-use conditions would provide constraints on what critical soil variables drive the large-scale variation in  $\text{NH}_4^+$  and  $\text{NO}_3^-$  contents.

The Cubist models were able to account for 36–68% of the measured variation in both  $\text{NH}_4^+$  and  $\text{NO}_3^-$  in the soil across the sites and within each region (Table 3 and Fig. 4). The contents of  $\text{NH}_4^+$  and  $\text{NO}_3^-$  were reasonably estimated by the model for each region. In contrast, the model performance of soil mineral N was substantially limited by high prediction error, particularly over a high range of contents at all sites and in the non-agricultural region. In addition, overall model performance was possibly limited by presence of samples with  $\text{NO}_3^-$  contents under the detection limit so that any differences in the selected soil variables could not be fully considered in the model, eventually leading to the over-simplified controls in each of the regions. As a result, much of the model error resulted from the lack of accuracy. In addition, the models may not capture all the processes and resulting variation as they were based on the limited data sets. Similar issues, such as the underestimation of relatively high  $\text{NO}_3^-$  contents, have been found using model-based approaches (Johnsson et al., 1987; Wu and McGeachan, 1998; Smith et al., 2008; Necpalova et al., 2015). The evaluation of these models suggests that the region-specific simulation of soil mineral N may not be sufficiently reliable at the continental scale, and this issue has been reported (Chang et al., 2001). These studies recommended further improvement in the mechanisms within the models, especially for hydrological or N transformation processes responsible for  $\text{NO}_3^-$  contents. Specifically, we need to focus more on mechanistic roles of different soil drivers in N cycling between the regions, temporal controls over N transformation, and biogeochemical hot spots/moments in N retention and removal. As such, it is especially relevant to continue the development of accurate models in order to predict general patterns when integrating different land uses.

### 4.3 Soil stoichiometric controls on $\text{NH}_4^+$ and $\text{NO}_3^-$

Stoichiometric interactions of total soil C, N, and P can be geographically related to the transformation processes between soil organic and inorganic N over large spatial scales. The states of soil TOC, TN, and TP have been reported at the continental scale for Australia (Viscarra Rossel et al., 2015) and across Australia's major agro-ecological regions (Bui and Henderson, 2013). As far as we know, little or no studies have addressed the fate of soil mineral N by directly linking to soil stoichiometric interactions of C, N and P at the continental scale in Australia, because of practical difficulties in directly measuring soil mineral N. We acknowledge this challenge and the need for more measurements at additional sites. Despite this limitation, our results suggest that soil organic matter and its C:N:P stoichiometry may contribute to the potential to maintain or increase  $\text{NH}_4^+$  contents in each region under different land uses. Specifically, there was a trend of increasing soil  $\text{NH}_4^+$  contents with increasing C:N (median 15.9 and 15.1), C:P (72.8 and 73.1), and N:P (5.0 and 4.5) ratios in the agricultural (Fig. 5) and non-agricultural regions (Fig. 6). There is also an indication that final soil elemental ratios are less affected by soil input stoichiometric ratios than previously expected and depends mostly on soil mineralogy (Frossard et al., 2016). Similarly, Kirkby et al. (2011) found that the stable portion of organic matter had relatively constant C:N:P ratios across a range of soil types. This suggests that soil  $\text{NH}_4^+$  dynamics may depend on the amount of C and N stored in the soil as well as the relative P limitation in soil nutrient quality. The effects of these elemental interactions on soil  $\text{NO}_3^-$  seemed to be important in the non-agricultural region only (Fig. 5 and 6), specifically through changes in the amount of N and P retained in soil organic matter.

Different organic matter depletion and composition, and N mineralization from soil organic matter between the regions can limit the initial step for the terrestrial N cycle and determine the fate of mineral N (Booth et al., 2005; Gardenas et al., 2011; Denk et al., 2017). Recently, Tipping et al. (2016) reported global averages of the C:N and C:P stoichiometry, which approximately corresponded to 8.3 and 62.5 for nutrient-rich soil organic matter and 25.6 and 909.0 for nutrient-poor soil organic matter. The contents of C, N and P and corresponding elemental ratios in the soil suggest that TN was limited, while TP was abundant, in Australian soil relative to organic C. However, plant-available P is typically very low in Australian soil (Dalal et al., 2003; Viscarra Rossel and Bui, 2016). Soil C:P and N:P ratios are known to increase in response to disturbance events, such as the level of soil tillage and fire intensity (Orians and Milewski, 2007; Bui and Henderson, 2013). Our soil stoichiometry results, although limited, generally support the general status of nutrient-poor soil organic matter, as previously shown by Viscarra Rossel et al. (2015). More importantly, these regional patterns may not be consistent over different spatial scales. For example, Kirkby et al. (2011) reported significantly higher C:P ratios for four Australian agricultural soils than international soils and thus potential P reduction due to total C loss at the field scale. Therefore, the importance of soil elemental interactions in determining the variation of mineral N at different spatial scales across and within various production and ecological conditions needs to be estimated.

## 5 Conclusions

The distribution of soil  $\text{NH}_4^+$  and  $\text{NO}_3^-$  contents was significantly affected by regional differences of land use across Australia. Despite a wide range of soil conditions, the nature of the main soil controls and interactions over soil N storage and availability

appeared to differ across the sites and between the agricultural and non-agricultural regions, constituting regionally explicit soil controls. Total organic C, TN, and TP had varying degrees of importance as a controlling factor between  $\text{NH}_4^+$  and  $\text{NO}_3^-$  and between regions. Assuming that total soil nutrients were related to the amount of soil N that can be retained, the effects of total soil elements was probably due to differences in the source type of mineral N and under declining or steady-state soil organic N. In addition, more complex effects of soil properties on  $\text{NO}_3^-$  than on  $\text{NH}_4^+$  were found in both regions. Our results also suggest that stoichiometric interactions of C, N, and P may provide potentially important constraints to the dynamics of mineral N at the sites, specifically for  $\text{NH}_4^+$  in each of the regions and  $\text{NO}_3^-$  in the non-agricultural region. Overall, large-scale  $\text{NH}_4^+$  and  $\text{NO}_3^-$  tended to be sensitive to N or P status relative to C in the soil nutrient budget, showing the biogeochemical role of soil nutrients in the regulation of soil mineral N cycling. The Cubist model was effective at explaining the region-specific heterogeneity of Australian soils, empirically related to the contents of mineral N. However, the mechanisms of mineral N cycling controlled by the soil properties were not evident at the continental scale. In addition, the current data set and models still under-represent the intensive production and other agro-ecological zones of Australia, and therefore more focus should be given to a mechanistic understanding of the large-scale changes in soil mineral N retention and losses at this scale.

*Competing interests.* The authors declare that they have no conflict of interest.

15 *Acknowledgements.* We would like to acknowledge the contribution of the Biomes of Australian Soil Environments (BASE) consortium (<https://data.bioplatforms.com/organization/pages/bpa-base/acknowledgements>) in the generation of data used in this publication. The BASE project is supported by funding from Bioplatforms Australia through the Australian Government National Collaborative Research Infrastructure Strategy (NCRIS).

## References

- Andrews, M., Raven, J. A., and Lea, P. J.: Do plants need nitrate? The mechanisms by which nitrogen form affects plants, *Annals of Applied Biology*, 163, 174–199, 2013.
- Angus, J. F. and Grace, P. R.: Nitrogen balance in Australia and nitrogen use efficiency on Australian farms, *Soil Research*, 55, 435–450, 2017.
- Bissett, A., Fitzgerald, A., Meintjes, T., Mele, P. M., Reith, F., Dennis, P. G., Breed, M. F., Brown, B., Brown, M. V., Brugger, J., Byrne, M., Caddy-Retalic, S., Carmody, B., Coates, D. J., Correa, C., Ferrari, B. C., Gupta, V. V. S. R., Hamonts, K., Haslem, A., Hugenholtz, P., Karan, M., Koval, J., Lowe, A. J., Macdonald, S., McGrath, L., Martin, D., Morgan, M., North, K. I., Paungfoo-Lonhienne, C., Pendall, E., Phillips, L., Pirzl, R., Powell, J. R., Ragan, M. A., Schmidt, S., Seymour, N., Snape, I., Stephen, J. R., Stevens, M., Tinning, M., Williams, K., Yeoh, Y. K., Zammit, C. M., and Young, A.: Introducing BASE: the Biomes of Australian Soil Environments soil microbial diversity database, *Gigascience*, 5, 2016.
- Booth, M. S., Stark, J. M., and Rastetter, E.: Controls on nitrogen cycling in terrestrial ecosystems: A synthetic analysis of literature data, *Ecological Monographs*, 75, 139–157, 2005.
- Bui, E. N. and Henderson, B. L.: C:N:P stoichiometry in Australian soils with respect to vegetation and environmental factors, *Plant and Soil*, 373, 553–568, 2013.
- Butterbach-Bahl, K., Baggs, E. M., Dannenmann, M., Kiese, R., and Zechmeister-Boltenstern, S.: Nitrous oxide emissions from soils: how well do we understand the processes and their controls?, *Philosophical Transactions of the Royal Society B-Biological Sciences*, 368, 2013.
- Chang, C. W., Laird, D. A., Mausbach, M. J., and , C. R.: Near-infrared reflectance spectroscopy-principal components regression analyses of soil properties, *Soil Science Society of America Journal*, 65, 480–490, 2001.
- Ciais, P., Sabine, C., Bala, G., Bopp, L., Brovkin, V., Canadell, J., Chhabra, A., DeFries, R., Galloway, J., Heimann, M., Jones, C., Le Quere, C., Myneni, R. B., Piao, S., and Thornton, P.: *Carbon and Other Biogeochemical Cycles*, chap. 6, p. 465–570, Cambridge University Press, Cambridge, United Kingdom and New York, NY, USA, 2013.
- Conley, D. J., Paerl, H. W., Howarth, R. W., Boesch, D. F., Seitzinger, S. P., Havens, K. E., Lancelot, C., and Likens, G. E.: Controlling eutrophication: nitrogen and phosphorus, *Science*, 323, 1014–1015, 2009.
- Dalal, R. C., Wang, W. J., Robertson, G. P., and Parton, W. J.: Nitrous oxide emission from Australian agricultural lands and mitigation options: a review, *Australian Journal of Soil Research*, 41, 165–195, 2003.
- De Schrijver, A., De Frenne, P., Ampoorter, E., Van Nevel, L., Demey, A., Wuyts, K., and Verheyen, K.: Cumulative nitrogen input drives species loss in terrestrial ecosystems, *Global Ecology and Biogeography*, 20, 803–816, 2011.
- Denk, T. R. A., Mohn, J., Decock, C., Lewicka-Szczebak, D., Harris, E., Butterbach-Bahl, K., Kiese, R., and Wolf, B.: The nitrogen cycle: A review of isotope effects and isotope modeling approaches, *Soil Biology and Biochemistry*, 105, 121–137, 2017.
- Dunne, K. A. and Willmott, C. J.: Global distribution of plant-extractable water capacity of soil, *International Journal of Climatology*, 16, 841–859, 1996.
- Farley, R. A. and Fitter, A. H.: Temporal and spatial variation in soil resources in a deciduous woodland, *Journal of Ecology*, 87, 688–696, 1999.

- Fowler, D., Coyle, M., Skiba, U., Sutton, M. A., Cape, J. N., Reis, S., Sheppard, L. J., Jenkins, A., Grizzetti, B., Galloway, J. N., Vitousek, P., Leach, A., Bouwman, A. F., Butterbach-Bahl, K., Dentener, F., Stevenson, D., Amann, M., and Voss, M.: The global nitrogen cycle in the twenty-first century, *Philosophical Transactions of the Royal Society B-Biological Sciences*, 368, 2013.
- 5 Frossard, E., Buchmann, N., Bünenmann, E. K., Kiba, D. I., Lompo, F., Oberson, A., Tamburini, F., and Traoré, O. Y. A.: Soil properties and not inputs control carbon : nitrogen : phosphorus ratios in cropped soils in the long term, *SOIL*, 2, 83–99, 2016.
- Fueki, N., Sato, K., and Nakatsu, S.: Interpretation of soil mineral nitrogen by scoring organic matter and nitrogen management as an "N-score" in the fields of Hokkaido before sugar beet planting, *Soil Science and Plant Nutrition*, 56, 750–759, 2010.
- Gardenas, A. I., Ågren, G. I., Bird, J. A., Clarholm, M., Hallin, S., Ineson, P., Katterer, T., Knicker, H., Nilsson, S. I., Näsholm, T., Ogle, S., Paustian, K., Persson, T., and Stendahl, J.: Knowledge gaps in soil carbon and nitrogen interactions : From molecular to global scale, *Soil*
- 10 *Biology and Biochemistry*, 43, 702–717, 2011.
- Gastal, F. and Lemaire, G.: N uptake and distribution in crops : an agronomical and ecophysiological perspective, *Journal of Experimental Botany*, 53, 789–799, 2002.
- Giebel, A., Wendroth, O., Reuter, H. I., Kersebaum, K. C., and Schwarz, J.: How representatively can we sample soil mineral nitrogen?, *Journal of Plant Nutrition and Soil Science-Zeitschrift Fur Pflanzenernahrung Und Bodenkunde*, 169, 52–59, 2006.
- 15 Glendining, M. J., Dailey, A. G., Powlson, D. S., Richter, G. M., Catt, J. A., and Whitmore, A. P.: Pedotransfer functions for estimating total soil nitrogen up to the global scale, *European Journal of Soil Science*, 62, 13–22, 2011.
- Haynes, R. J. and Goh, K. M.: Ammonium and nitrate nutrition of plants, *Biological Reviews*, 53, 465–510, 1978.
- Johnsson, H., Bergstrom, L., Jansson, P.-E., and Paustian, K.: Simulated nitrogen dynamics and losses in a layered agricultural soil, *Agriculture, Ecosystems and Environment*, 18, 333–356, 1987.
- 20 Johnston, C. A.: Material fluxes across wetland ecotones in northern landscapes, *Ecological Applications*, 3, 424–440, 1993.
- Kirkby, C. A., Kirkegaard, J. A., Richardson, A. E., Wade, L. J., Blanchard, C., and Batten, G.: Stable soil organic matter : A comparison of C : N : P : S ratios in Australian and other world soils, *Geoderma*, 163, 197–208, 2011.
- Liu, D. W., Zhu, W. X., Wang, X. B., Pan, Y. P., Wang, C., Xi, D., Bai, E., Wang, Y. S., Han, X. G., and Fang, Y. T.: Abiotic versus biotic controls on soil nitrogen cycling in drylands along a 3200 km transect, *Biogeosciences*, 14, 989–1001, 2017.
- 25 Luo, Y., Su, B., Currie, W. S., Dukes, J. S., Finzi, A. C., Hartwig, U., Hungate, B., McMurtrie, R. E., Oren, R., Parton, W. J., Pataki, D. E., Shaw, M. R., Zak, D. R., and Field, C. B.: Progressive nitrogen limitation of ecosystem responses to rising atmospheric carbon dioxide, *Bioscience*, 54, 731–739, 2004.
- Necpalova, M., Anex, R. P., Fienen, M. N., Del Grosso, S. J., Castellano, M. J., Sawyer, J. E., Iqbal, J., Pantoja, J. L., and Barker, D. W.: Understanding the DayCent model : Calibration, sensitivity, and identifiability through inverse modeling, *Environmental Modelling Software*, 66, 110–130, 2015.
- 30 Neff, J. C., Townsend, A. R., Gleixner, G., Lehman, S. J., Turnbull, J., and Bowman, W. D.: Variable effects of nitrogen additions on the stability and turnover of soil carbon, *Nature*, 419, 915–917, <https://doi.org/10.1038/nature01136>, <GotoISI>://WOS:000178909700040, 2002.
- Orians, G. H. and Milewski, A. V.: Ecology of Australia : the effects of nutrient-poor soils and intense fires, *Biological Reviews*, 82, 393–423,
- 35 2007.
- Post, W. M. and Kwon, K. C.: Soil carbon sequestration and land-use change : Processes and potential, *Global Change Biology*, 6, 317–327, 2000.
- Post, W. M., Pastor, J., Zinke, P. J., and Stangenberger, A. G.: Global Patterns of soil nitrogen storage, *Nature*, 317, 613–616, 1985.

- Quinlan, J. R.: Learning with continuous classes. *Proceedings of the 5th Australian Joint Conference On Artificial Intelligence*, p. 343–348, 1992.
- Rastetter, E. B., Agren, G. I., and Shaver, G. R.: Responses of N-limited ecosystems to increased CO<sub>2</sub>: A balanced-nutrition, coupled-element-cycles model, *Ecological Applications*, 7, 444–460, 1997.
- 5 Ravishankara, A. R., Daniel, J. S., and Portmann, R. W.: Nitrous Oxide (N<sub>2</sub>O): The dominant ozone-depleting substance emitted in the 21st century, *Science*, 326, 123–125, 2009.
- Saxton, K. E., Rawls, W. J., Romberger, J. S., and Papendick, R. I.: Estimating generalized soil-water characteristics from texture, *Soil Science Society of America Journal*, 50, 1031–1036, 1986.
- Shahbaz, M., Kuzyakov, Y., Maqsood, S., Wendland, M., and Heitkamp, F.: Decadal nitrogen fertilization decreases mineral-associated and subsoil carbon: A 32-year study, *Land Degradation Development*, 28, 1463–1472, <https://doi.org/10.1002/ldr.2667>, <GotoISI>://WOS:000401322900027, 2017.
- 10 Smith, W. N., Grant, B. B., Desjardins, R. L., Rochette, P., Drury, C. F., and Li, C.: Evaluation of two process-based models to estimate soil N<sub>2</sub>O emissions in Eastern Canada, *Canadian Journal of Soil Science*, 88, 251–260, 2008.
- Stiles, W. A. V., Rowe, E. C., and Dennis, P.: Long-term nitrogen and phosphorus enrichment alters vegetation species composition and reduces carbon storage in upland soil, *Science of the Total Environment*, 593, 688–694, 2017.
- 15 Taylor, P. G. and Townsend, A. R.: Stoichiometric control of organic carbon-nitrate relationships from soils to the sea, *Nature*, 464, 1178–1181, 2010.
- Thornton, P. E., Lamarque, J. F., Rosenbloom, N. A., and Mahowald, N. M.: Influence of carbon-nitrogen cycle coupling on land model response to CO<sub>2</sub> fertilization and climate variability, *Global Biogeochemical Cycles*, 21, 2007.
- 20 Tipping, E., Somerville, C. J., and Luster, J.: The C : N : P : S stoichiometry of soil organic matter, *Biogeochemistry*, 130, 117–131, 2016.
- Vagstad, N., Eggstad, H. O., and Hoyas, T. R.: Mineral nitrogen in agricultural soils and nitrogen losses : Relation to soil properties, weather conditions, and farm practices, *Ambio*, 26, 266–272, 1997.
- Viscarra Rossel, R. A. and Bui, E. N.: A new detailed map of total phosphorus stocks in Australian soil, *Science of the Total Environment*, 542, 1040–1049, 2016.
- 25 Viscarra Rossel, R. A., Webster, R., Bui, E. N., and Baldock, J. A.: Baseline map of organic carbon in Australian soil to support national carbon accounting and monitoring under climate change, *Global Change Biology*, 20, 2953–2970, 2014.
- Viscarra Rossel, R. A., Chen, C., Grundy, M. J., Searle, R., Clifford, D., and Campbell, P. H.: The Australian three-dimensional soil grid : Australia’s contribution to the GlobalSoilMap project, *Soil Research*, 53, 845–864, 2015.
- Vitousek, P. M., Aber, J. D., Howarth, R. W., Likens, G. E., Matson, P. A., Schindler, D. W., Schlesinger, W. H., and Tilman, D.: Human alteration of the global nitrogen cycle : Sources and consequences, *Ecological Applications*, 7, 737–750, 1997.
- 30 Watson, C. J. and Mills, C. L.: Gross nitrogen transformations in grassland soils as affected by previous management intensity, *Soil Biology and Biochemistry*, 30, 743–753, 1998.
- Wu, L. and McGechan, M. B.: A review of carbon and nitrogen processes in four soil nitrogen dynamics models, *Journal of Agricultural Engineering Research*, 69, 279–305, 1998.
- 35 Zaehle, S.: Terrestrial nitrogen-carbon cycle interactions at the global scale, *Philosophical Transactions of the Royal Society B : Biological Sciences*, 368, 20130 125, 2013.

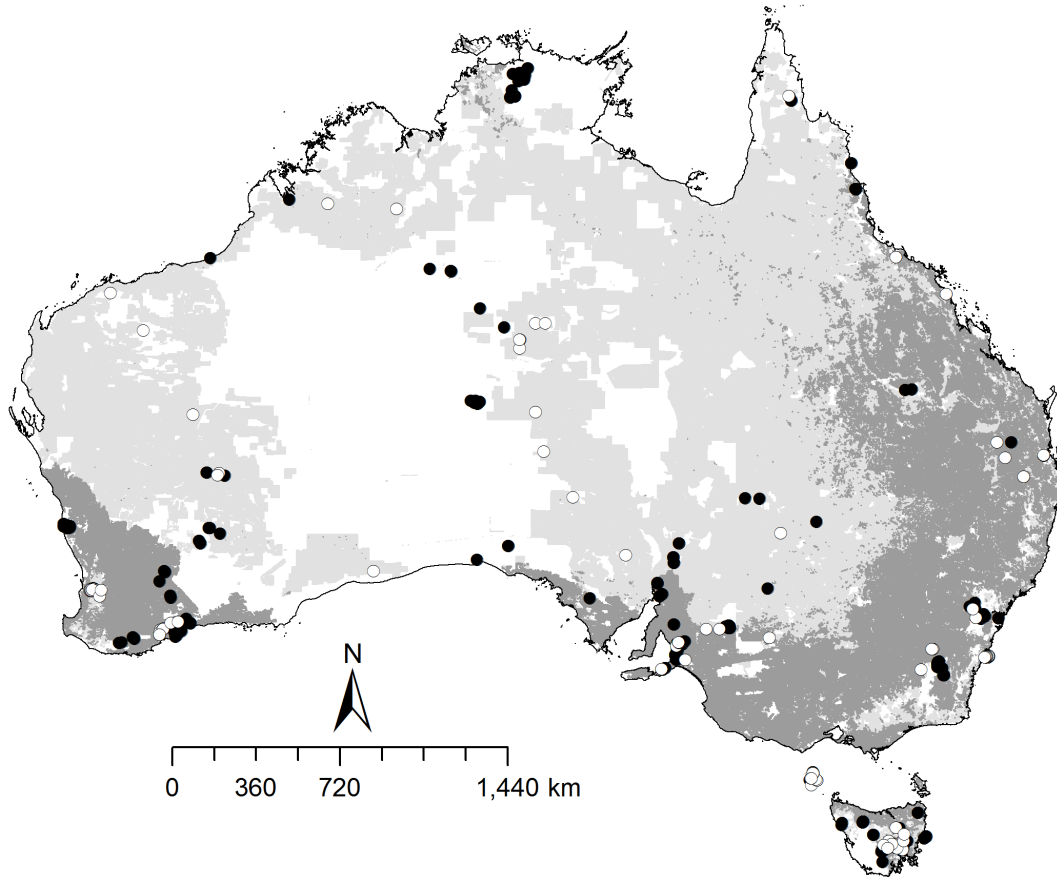

**Figure 1.** Location of 469 sampling sites across Australia, indicated with open circles for soils used for dryland and irrigated cropping, and from improved and native pastures used for animal grazing (160 sites) and closed circles for soils from areas that are conserved and in natural environments outside of the agricultural production zones (309 sites). The dark grey area represents intensive agricultural and plantation production. The light grey area represents agricultural production from relatively natural environments. The white area indicates the **non-agricultural** region.



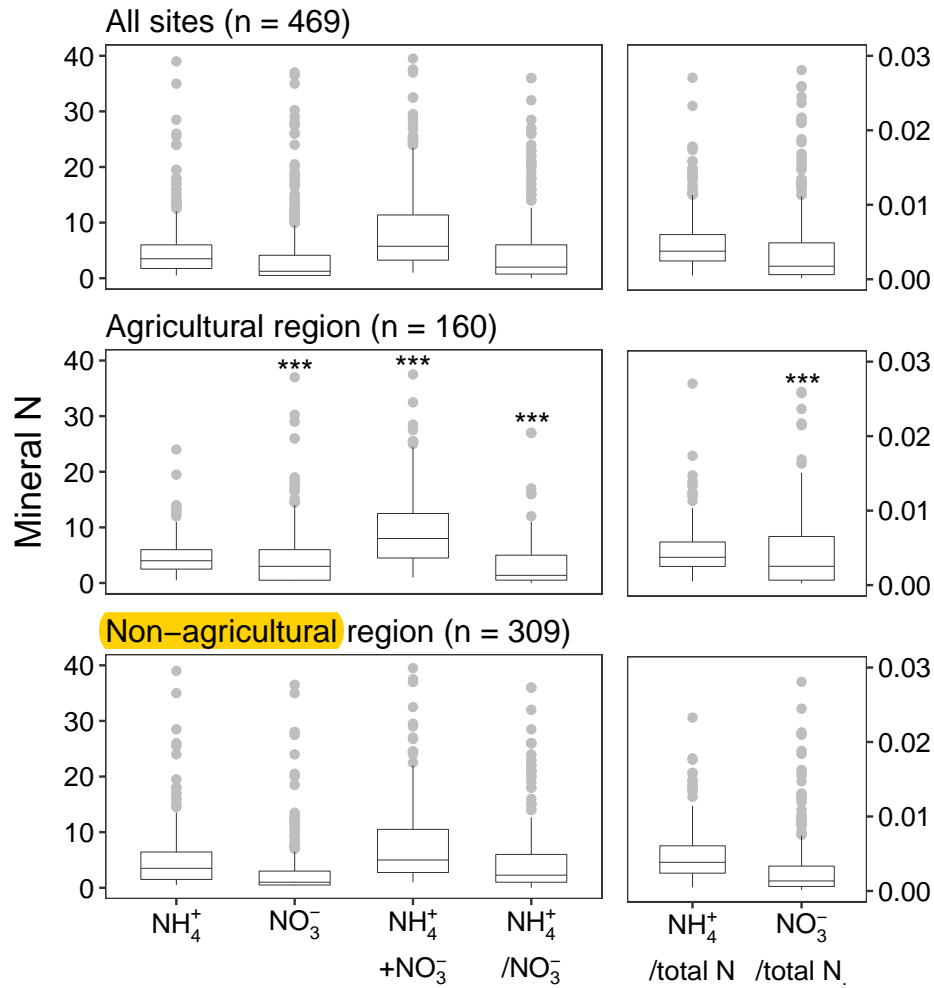

**Figure 2.** Mineral N contents (mg N kg<sup>-1</sup>) and fractions of total N in soil. The bottom, middle and top of each box represents the 25th, 50th (median) and 75th percentiles, respectively. The points above the whiskers are extreme values. Means between main agricultural and non-agricultural regions of Australia are significantly different at P-value < 0.001 (\*\*\*), if indicated based on ANOVA on the log of the values

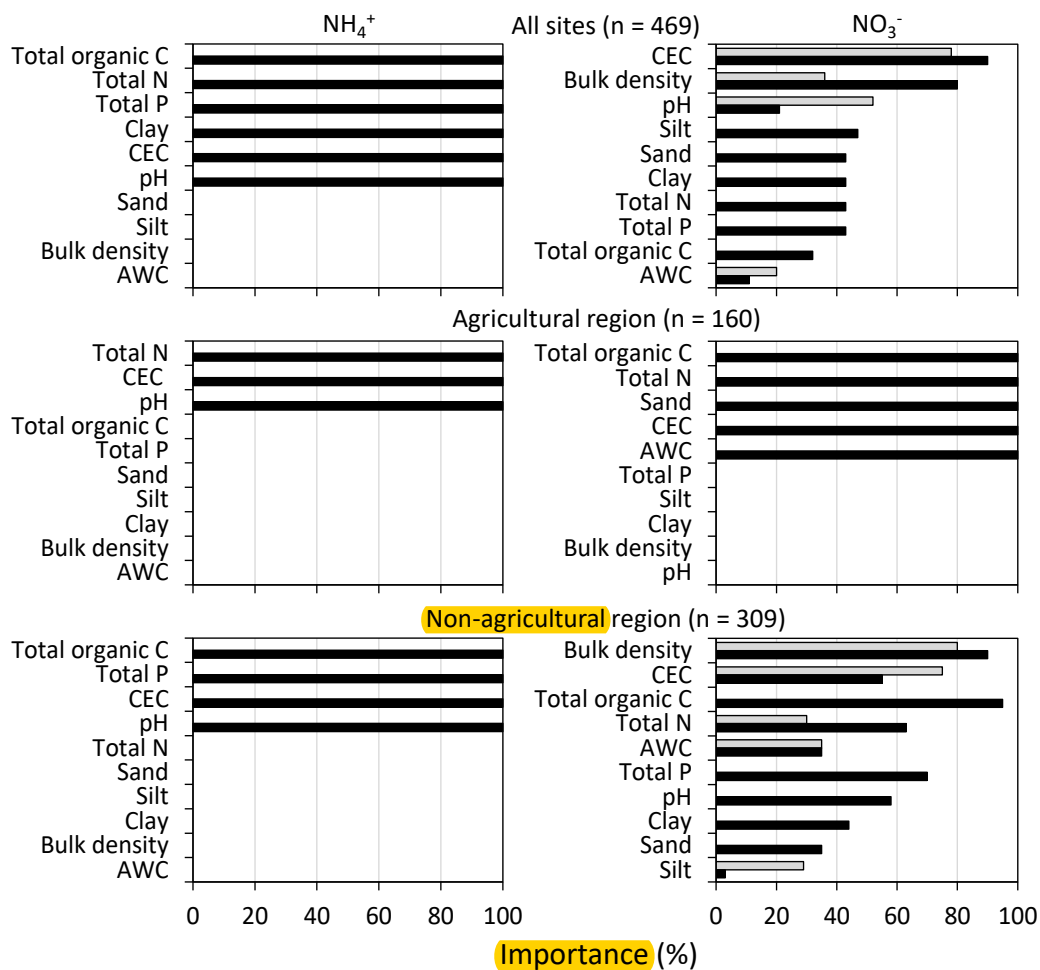

**Figure 3.** Importance of soil attributes as the predictors of  $\text{NH}_4^+$  and  $\text{NO}_3^-$  contents ( $\text{mg N kg}^{-1}$ ). The importance of the predictors is based on the usage of each variable in the rule conditions (grey bars) and in the Cubist model (black bars). Abbreviations: CEC, effective cation exchange; AWC, available water capacity.

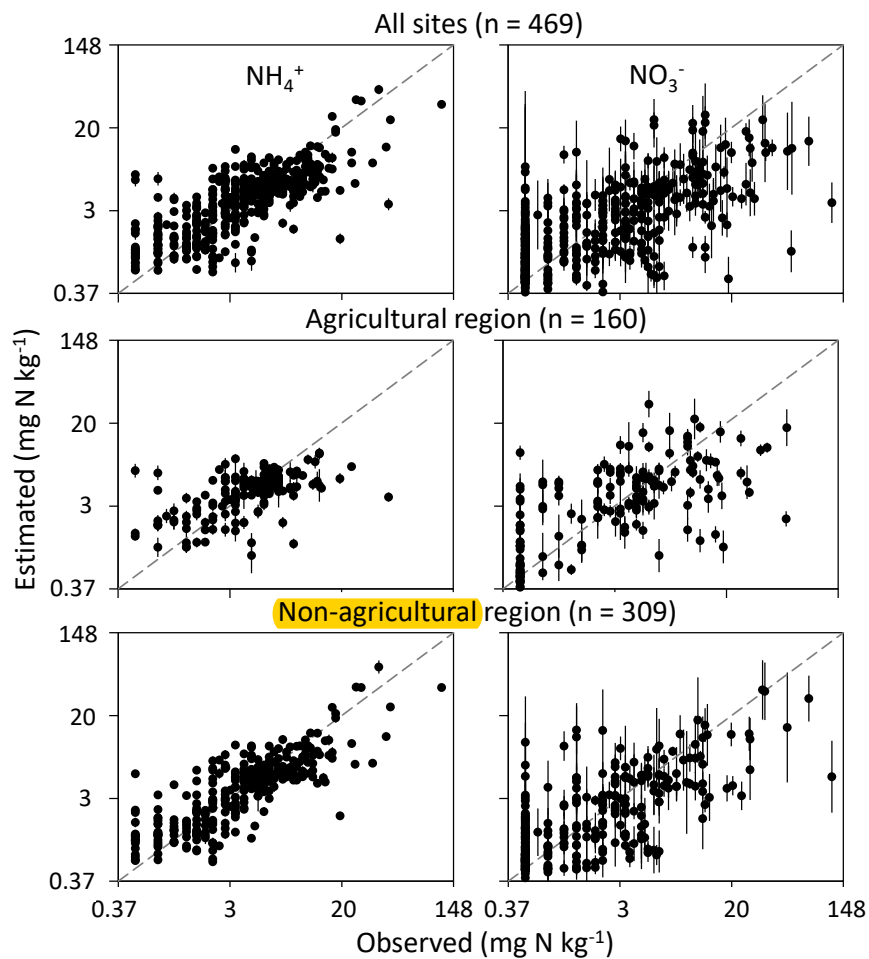

**Figure 4.** Soil  $\text{NH}_4^+$  and  $\text{NO}_3^-$  contents on the log-transformed scale estimated by optimized Cubist models. Points represent model evaluation by 10-fold 50-repeated cross-validation. The error bar is the standard deviation of the estimated mineral N content. The 1 : 1 line is indicated.

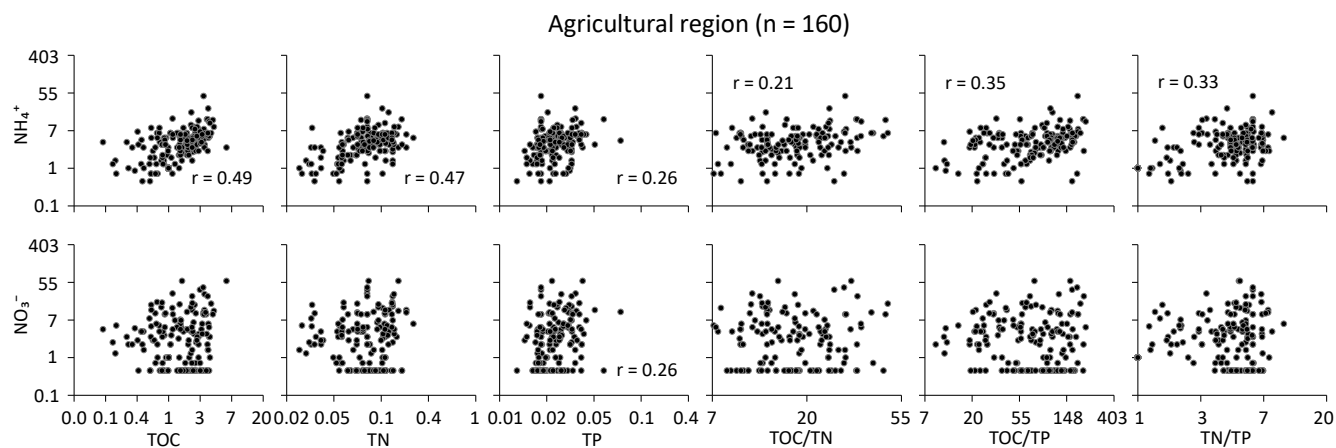

**Figure 5.** For  $\text{NH}_4^+$  and  $\text{NO}_3^-$  ( $\text{mg N kg}^{-1}$ ), scatter plots of total organic C (TOC), total N (TN), total P (TP) and element ratios on the log-transformed scale in the agricultural region. The unit is expressed as percent C, N, or P by weight of soil. Pearson's correlation coefficient is reported only when the trend is significant ( $p < 0.05$ ).

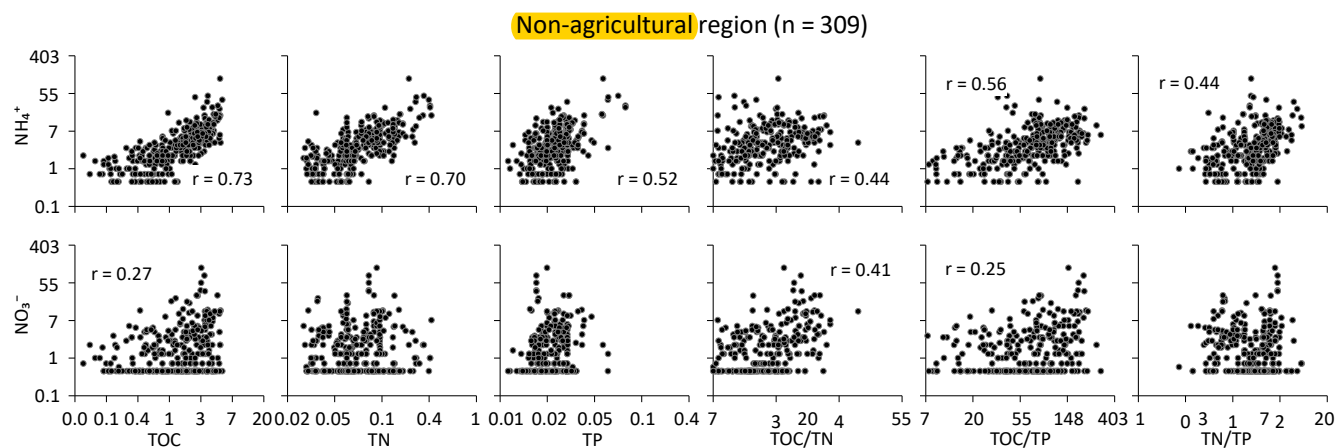

**Figure 6.** For  $\text{NH}_4^+$  and  $\text{NO}_3^-$  ( $\text{mg N kg}^{-1}$ ), scatter plots of total organic C (TOC), total N (TN), total P (TP) and element ratios on the log-transformed scale in the non-agricultural region where soil is used for conservation and under natural vegetation. The unit is expressed as percent C, N, or P by weight of soil. Pearson's correlation coefficient is reported only when the trend is significant ( $p < 0.05$ ).

**Table 1.** Summary of  $\text{NH}_4^+$  and  $\text{NO}_3^-$  contents ( $\text{mg N kg}^{-1}$ ) in Australian soil by land use across 469 sites. Means with different letter are significantly different at  $p < 0.05$ , based on Tukey's HSD on the log of the values. Any categorical variables with a sample size of  $< 10$  are considered in the multiple mean comparisons but not presented in the table. See Table S1 for the definition of land uses.

|                   | n                                                     | NH <sub>4</sub> <sup>+</sup> |      |      | NO <sub>3</sub> <sup>-</sup> |        |      | Mean | Max  | Min   |     |
|-------------------|-------------------------------------------------------|------------------------------|------|------|------------------------------|--------|------|------|------|-------|-----|
|                   |                                                       | Median                       | Mean | Max  | Min                          | Median | Mean |      |      |       |     |
| Broad land use    |                                                       |                              |      |      |                              |        |      |      |      |       |     |
| Agricultural      | Production from dryland agriculture and plantations   | 81                           | 4.5  | 5.7  | 46.5                         | 0.5    | 4.0  | 7.8  | a    | 59.0  | 0.5 |
|                   | Production from irrigated agriculture and plantations | 11                           | 6.0  | 6.1  | 14.0                         | 0.9    | 4.5  | 8.8  | a    | 30.3  | 0.8 |
|                   | Production from relatively natural environments       | 68                           | 3.0  | 3.7  | 13.5                         | 0.5    | 1.5  | 3.4  | b    | 26.0  | 0.5 |
| Non-agricultural  | Conservation and natural environments                 | 309                          | 3.5  | 5.6  | 120.0                        | 0.5    | 1.0  | 3.8  | b    | 121.0 | 0.5 |
| Detailed land use |                                                       |                              |      |      |                              |        |      |      |      |       |     |
| Agricultural      | Cropping                                              | 16                           | 2.5  | 3.4  | bc                           | 0.5    | 4.5  | 6.2  | ab   | 18.5  | 0.5 |
|                   | Environmental forest plantation                       | 12                           | 4.8  | 4.8  | abc                          | 1.5    | 0.5  | 0.6  | cd   | 1.3   | 0.5 |
|                   | Grazing modified pastures                             | 45                           | 5.5  | 7.3  | ac                           | 0.5    | 5.0  | 11.0 | a    | 59.0  | 0.5 |
|                   | Grazing native vegetation                             | 45                           | 3.0  | 3.6  | bc                           | 0.5    | 2.5  | 4.8  | ab   | 26.0  | 0.5 |
|                   | Production native forests                             | 23                           | 3.0  | 4.0  | abc                          | 1.3    | 0.5  | 0.6  | d    | 1.5   | 0.5 |
| Non-agricultural  | Habitat/species management area                       | 10                           | 15.0 | 28.1 | a                            | 2.0    | 1.0  | 1.3  | bcde | 2.5   | 0.5 |
|                   | National park                                         | 171                          | 3.5  | 4.9  | bc                           | 0.5    | 0.5  | 3.3  | cde  | 80.0  | 0.5 |
|                   | Natural feature protection                            | 21                           | 5.0  | 5.7  | abc                          | 0.8    | 2.0  | 9.0  | abe  | 121.0 | 0.5 |
|                   | Other conserved area                                  | 18                           | 1.8  | 3.1  | b                            | 0.5    | 0.8  | 2.9  | bcde | 11.0  | 0.5 |
|                   | Residual native cover                                 | 60                           | 3.8  | 5.3  | abc                          | 0.5    | 2.1  | 3.7  | b    | 28.0  | 0.5 |

**Table 2.** Significant Pearson’s correlation coefficients between soil  $\text{NH}_4^+$  or  $\text{NO}_3^-$  ( $\text{mg N kg}^{-1}$ ) and selected soil variables at p-value < 0.05 (n = 469). The correlations indicated by “ns” are not significant.

| Variable                                                      | $\text{NH}_4^+$ |                     |                         | $\text{NO}_3^-$ |                     |                         |
|---------------------------------------------------------------|-----------------|---------------------|-------------------------|-----------------|---------------------|-------------------------|
|                                                               | All sites       | Agricultural region | Non-agricultural region | All sites       | Agricultural region | Non-agricultural region |
| Total organic C (%)                                           | 0.67            | 0.49                | 0.73                    | 0.21            | ns                  | 0.27                    |
| Total N (%)                                                   | 0.65            | 0.47                | 0.70                    | ns              | ns                  | ns                      |
| Total P (%)                                                   | 0.46            | 0.26                | 0.52                    | 0.14            | 0.26                | 0.08                    |
| Sand (%)                                                      | -0.31           | -0.20               | -0.43                   | -0.29           | -0.23               | -0.37                   |
| Silt (%)                                                      | 0.41            | 0.17                | 0.53                    | 0.24            | 0.16                | 0.3                     |
| Clay (%)                                                      | 0.43            | 0.19                | 0.53                    | 0.31            | 0.25                | 0.35                    |
| Bulk density ( $\text{g cm}^{-3}$ )                           | -0.50           | -0.24               | -0.58                   | ns              | ns                  | ns                      |
| Cation exchange capacity ( $\text{meq } 100 \text{ g}^{-1}$ ) | 0.27            | ns                  | 0.33                    | 0.51            | 0.52                | 0.50                    |
| pH                                                            | -0.43           | -0.23               | -0.51                   | 0.30            | 0.38                | 0.25                    |
| Available water capacity                                      | 0.12            | ns                  | 0.14                    | ns              | 0.35                | ns                      |

**Table 3.** Cross-validation statistics (mean ± standard deviation) of Cubist model on the estimation of  $\text{NH}_4^+$  and  $\text{NO}_3^-$  contents ( $\text{mg N kg}^{-1}$ ) in soils. The performance of the models was evaluated with 10-fold 50-repeated cross-validation with instance-based corrections. The coefficient of determination ( $R^2$ ), the root mean squared error (RMSE), estimated bias (ME), and the standard error of estimated bias (SDE) are considered.

|                 |       | All sites        | Agricultural region | Non-agricultural region |
|-----------------|-------|------------------|---------------------|-------------------------|
| $\text{NH}_4^+$ | $R^2$ | $0.60 \pm 0.11$  | $0.36 \pm 0.21$     | $0.68 \pm 0.10$         |
|                 | RMSE  | $0.60 \pm 0.09$  | $0.65 \pm 0.16$     | $0.58 \pm 0.09$         |
|                 | ME    | $-0.01 \pm 0.07$ | $-0.02 \pm 0.14$    | $-0.01 \pm 0.09$        |
|                 | SDE   | $0.60 \pm 0.09$  | $0.66 \pm 0.16$     | $0.58 \pm 0.09$         |
| $\text{NO}_3^-$ | $R^2$ | $0.42 \pm 0.13$  | $0.47 \pm 0.19$     | $0.47 \pm 0.16$         |
|                 | RMSE  | $1.01 \pm 0.17$  | $0.99 \pm 0.22$     | $0.92 \pm 0.19$         |
|                 | ME    | $0.00 \pm 0.13$  | $0.05 \pm 0.23$     | $0.05 \pm 0.16$         |
|                 | SDE   | $1.01 \pm 0.18$  | $1.00 \pm 0.23$     | $0.92 \pm 0.19$         |
